# Supplementary material
Source: PubMed Central journal article supplement (PMC4274811)
Supplement: NIHMS628937-supplement-Supplementary_Material.pdf [file NIHMS628937-supplement-Supplementary_Material.pdf]

# Supplemental Materials for “Generalized Ordinary Differential Equation Models”

Hongyu Miao, Hulin Wu and Hongqi Xue

## A Proof of Theorem

**Theorem 1.** Assume that there exists a  $\lambda > 0$  such that  $\delta = O(N^{-\lambda})$ , then under Assumptions A1-A8, we have  $\hat{\alpha} \xrightarrow{p} \alpha_0$ .

**Proof:** Denote

$$\begin{aligned} & \tilde{M}_n(\alpha) \\ = & \frac{1}{N} L(\alpha; \mathbf{y}, \tilde{\mathbf{x}}, \mathbf{z}) = \frac{1}{N} \sum_{i=1}^n \sum_{k=1}^{K_i} \sum_{s=1}^{S_{ik}} \ell(\alpha; y_{iks}, \tilde{\mathbf{x}}_i, \mathbf{z}_{ik}) \\ = & \frac{1}{N} \sum_{i=1}^n \sum_{k=1}^{K_i} \sum_{s=1}^{S_{ik}} \left[ \frac{y_{iks} \cdot b'^{-1} \circ g^{-1} \circ g^*(\mathbf{z}_{ik}, \tilde{\mathbf{x}}(t_i, \boldsymbol{\theta}), \boldsymbol{\beta}) - b\{b'^{-1} \circ g^{-1} \circ g^*(\mathbf{z}_{ik}, \tilde{\mathbf{x}}(t_i, \boldsymbol{\theta}), \boldsymbol{\beta})\}}{a(\phi)} + c(y_{iks}, \phi) \right], \end{aligned}$$

$$\begin{aligned} & M_n(\alpha) \\ = & \frac{1}{N} L(\alpha; \mathbf{y}, \mathbf{x}, \mathbf{z}) = \frac{1}{N} \sum_{i=1}^n \sum_{k=1}^{K_i} \sum_{s=1}^{S_{ik}} \ell(\alpha; y_{iks}, \mathbf{x}_i, \mathbf{z}_{ik}) \\ = & \frac{1}{N} \sum_{i=1}^n \sum_{k=1}^{K_i} \sum_{s=1}^{S_{ik}} \left[ \frac{y_{iks} \cdot b'^{-1} \circ g^{-1} \circ g^*(\mathbf{z}_{ik}, \mathbf{x}(t_i, \boldsymbol{\theta}), \boldsymbol{\beta}) - b\{b'^{-1} \circ g^{-1} \circ g^*(\mathbf{z}_{ik}, \mathbf{x}(t_i, \boldsymbol{\theta}), \boldsymbol{\beta})\}}{a(\phi)} + c(y_{iks}, \phi) \right], \end{aligned}$$

and

$$M(\alpha) = \ell(\alpha; \mathbf{y}, \mathbf{x}, \mathbf{z}) = \frac{y \cdot b'^{-1} \circ g^{-1} \circ g^*(\mathbf{z}, \mathbf{x}(t, \boldsymbol{\theta}), \boldsymbol{\beta}) - b\{b'^{-1} \circ g^{-1} \circ g^*(\mathbf{z}, \mathbf{x}(t, \boldsymbol{\theta}), \boldsymbol{\beta})\}}{a(\phi)} + c(y, \phi).$$

First, we claim that  $E_0[M(\alpha)]$  reaches its unique maximum at  $\alpha = \alpha_0$ . In fact, by the Jensen's inequality and the convexity of function  $-\log x$ , we have

$$E_0[M(\alpha)] - E_0[M(\alpha_0)] = E_0[\ell(\alpha; \mathbf{y}, \mathbf{x}, \mathbf{z}) - \ell(\alpha_0; \mathbf{y}, \mathbf{x}, \mathbf{z})] \leq 0,$$

i.e.,  $\alpha = \alpha_0$  is one maximum point of function  $E_0[M(\alpha)]$ . Moreover, from Assumption A6, it follows that it is the unique maximum point. Thus the above claim holds.

Next, with the Taylor expansion, for any  $\alpha_1, \alpha_2 \in \Theta \times \mathcal{B} \times \Phi$ , we can easily obtain

$$|M_n(\alpha_1) - M_n(\alpha_2)| \leq C(\mathbf{y}, \mathbf{x}, \mathbf{z}) \|\alpha_1 - \alpha_2\|, \quad (\text{A.1})$$

where  $C(\mathbf{y}, \mathbf{x}, \mathbf{z})$  is bounded. By the weak law of large numbers, it follows that for every fixed  $\alpha$ ,  $M_n(\alpha) - E_0[M(\alpha)] \xrightarrow{p} 0$ . Then under Assumption A1, by Corollary 2 in Andrews (1987), we have that  $\sup_{\alpha} |M_n(\alpha) - E_0[M(\alpha)]| \xrightarrow{p} 0$ . Thus it follows that  $M_n(\hat{\alpha}) - E_0[M(\hat{\alpha})] \xrightarrow{p} 0$  and  $M_n(\alpha_0) - E_0[M(\alpha_0)] \xrightarrow{p} 0$ .

Based on the formulation of  $\ell$  in Section 3.1, for a variate  $x$ ,  $\frac{\partial}{\partial x} \ell(\boldsymbol{\alpha}; y_{iks}, x, \mathbf{z}_{ik})$  is continuous and bounded. In addition, the function  $\mathbf{x}_i = \mathbf{x}(t_i, \boldsymbol{\theta})$  is continuous and bounded. Thus  $\frac{\partial}{\partial x} \ell(\boldsymbol{\alpha}; y_{iks}, x, \mathbf{z}_{ik})|_{x=\mathbf{x}(t_i, \boldsymbol{\theta})}$  is  $O_p(1)$ . It is similar for  $\tilde{\mathbf{x}}_i$ . Then by Lemma 1 in [Xue et al. \(2010\)](#) and the first-order Taylor expansion, it follows

$$\begin{aligned}
\tilde{M}_n(\boldsymbol{\alpha}) &= \frac{1}{N} \sum_{i=1}^n \sum_{k=1}^{K_i} \sum_{s=1}^{S_{ik}} \ell(\boldsymbol{\alpha}; y_{iks}, \tilde{\mathbf{x}}_i, \mathbf{z}_{ik}) \\
&= \frac{1}{N} \sum_{i=1}^n \sum_{k=1}^{K_i} \sum_{s=1}^{S_{ik}} \ell(\boldsymbol{\alpha}; y_{iks}, \mathbf{x}_i + O(N^{-\lambda(p \wedge 4)}), \mathbf{z}_{ik}) \\
&= \frac{1}{N} \sum_{i=1}^n \sum_{k=1}^{K_i} \sum_{s=1}^{S_{ik}} \ell(\boldsymbol{\alpha}; y_{iks}, \mathbf{x}_i, \mathbf{z}_{ik}) + O_p(N^{-\lambda(p \wedge 4)}) \\
&= M_n(\boldsymbol{\alpha}) + O_p(N^{-\lambda(p \wedge 4)}).
\end{aligned}$$

Then

$$\tilde{M}_n(\hat{\boldsymbol{\alpha}}) - E_0[M(\boldsymbol{\alpha}_0)] \leq \tilde{M}_n(\hat{\boldsymbol{\alpha}}) - E_0[M(\hat{\boldsymbol{\alpha}})] = M_n(\hat{\boldsymbol{\alpha}}) + O_p(N^{-\lambda(p \wedge 4)}) - E_0[M(\hat{\boldsymbol{\alpha}})].$$

and

$$\tilde{M}_n(\hat{\boldsymbol{\alpha}}) - E_0[M(\boldsymbol{\alpha}_0)] \geq \tilde{M}_n(\boldsymbol{\alpha}_0) - E_0[M(\boldsymbol{\alpha}_0)] = M_n(\boldsymbol{\alpha}_0) + O_p(N^{-\lambda(p \wedge 4)}) - E_0[M(\boldsymbol{\alpha}_0)].$$

Hence  $\tilde{M}_n(\hat{\boldsymbol{\alpha}}) - E_0[M(\boldsymbol{\alpha}_0)] \xrightarrow{p} 0$ , when  $N \rightarrow \infty$  and  $\lambda > 0$ . Thus

$$|E_0[M(\hat{\boldsymbol{\alpha}})] - E_0[M(\boldsymbol{\alpha}_0)]| \leq |\tilde{M}_n(\hat{\boldsymbol{\alpha}}) - E_0[M(\hat{\boldsymbol{\alpha}})]| + |\tilde{M}_n(\hat{\boldsymbol{\alpha}}) - E_0[M(\boldsymbol{\alpha}_0)]| \xrightarrow{p} 0. \quad (\text{A.2})$$

Now, we claim that  $\hat{\boldsymbol{\alpha}}$  weakly converges to  $\boldsymbol{\alpha}_0$ . Otherwise, for sequence  $\{\hat{\boldsymbol{\alpha}}\}$  in the compact subset  $\Theta \times \mathcal{B} \times \Phi$ , there exists a convergent subsequence,  $\{\hat{\boldsymbol{\alpha}}_{n_k}\}$ , such that  $\hat{\boldsymbol{\alpha}}_{n_k} \xrightarrow{p} \boldsymbol{\alpha}_*$  and  $\boldsymbol{\alpha}_* \neq \boldsymbol{\alpha}_0$ . From the continuous mapping theorem, it follows that  $E_0[M(\hat{\boldsymbol{\alpha}}_{n_k})] \xrightarrow{p} E_0[M(\boldsymbol{\alpha}_*)]$ . From [\(A.2\)](#), we have  $E_0[M(\hat{\boldsymbol{\alpha}}_{n_k})] \xrightarrow{p} E_0[M(\boldsymbol{\alpha}_0)]$ . Then  $E_0[M(\boldsymbol{\alpha}_*)] = E_0[M(\boldsymbol{\alpha}_0)]$ . Since  $\boldsymbol{\alpha}_0$  is the unique maximum point of  $E_0[M(\boldsymbol{\alpha})]$ , we have  $\boldsymbol{\alpha}_* = \boldsymbol{\alpha}_0$ , which is contradictory to  $\boldsymbol{\alpha}_* \neq \boldsymbol{\alpha}_0$ . Thus  $\hat{\boldsymbol{\alpha}} \xrightarrow{p} \boldsymbol{\alpha}_0$ .  $\square$

**Theorem 2.** (i) For  $\delta = O(N^{-\lambda})$  with  $\lambda > 1/(p \wedge 4)$  where  $p$  is the order of the numerical method, under Assumptions A1-A10, we have that  $\sqrt{N}(\hat{\alpha} - \alpha_0) \xrightarrow{d} \mathcal{N}(0, \mathbf{H}^{-1})$ ;

(ii) For  $\delta = O(N^{-\lambda})$  with  $0 < \lambda \leq 1/(p \wedge 4)$ , under Assumptions A1-A10, we have that  $\sqrt{N}(\hat{\alpha} - \tilde{\alpha}) \xrightarrow{d} \mathcal{N}(0, \tilde{\mathbf{H}}^{-1})$  with  $\|\tilde{\alpha} - \alpha_0\| = O_p(\delta^{(p \wedge 4)/2}) = O_p(N^{-\lambda(p \wedge 4)/2})$  and  $\|\tilde{\mathbf{H}} - \mathbf{H}\| = O_p(\delta^{(p \wedge 4)/2}) = O_p(N^{-\lambda(p \wedge 4)/2})$ .

**Proof:** For the proof of Part (i), it suffices to verify conditions of Theorem 3.1 in [Newey and McFadden \(1994\)](#) on asymptotic normality for a M-estimator. Denote

$$\begin{aligned} \tilde{G}_n(\alpha) &= \begin{pmatrix} \frac{\partial \tilde{M}_n(\alpha)}{\partial \theta} \\ \frac{\partial \tilde{M}_n(\alpha)}{\partial \beta} \\ \frac{\partial \tilde{M}_n(\alpha)}{\partial \phi} \end{pmatrix} = \begin{pmatrix} \frac{1}{N} \sum_{i=1}^n \sum_{k=1}^{K_i} \sum_{s=1}^{S_{ik}} \frac{\partial \ell(\alpha; y_{iks}, \tilde{\mathbf{x}}(t_i, \theta), \mathbf{z}_{ik})}{\partial g^*} \frac{\partial g^*(\mathbf{z}_{ik}, \tilde{\mathbf{x}}(t_i, \theta), \beta)}{\partial \tilde{\mathbf{x}}} \Big|_{\tilde{\mathbf{x}}=\tilde{\mathbf{x}}(t_i, \theta)} \frac{\partial \tilde{\mathbf{x}}(t_i, \theta)}{\partial \theta} \\ \frac{1}{N} \sum_{i=1}^n \sum_{k=1}^{K_i} \sum_{s=1}^{S_{ik}} \frac{\partial \ell(\alpha; y_{iks}, \tilde{\mathbf{x}}(t_i, \theta), \mathbf{z}_{ik})}{\partial g^*} \frac{\partial g^*(\mathbf{z}_{ik}, \tilde{\mathbf{x}}(t_i, \theta), \beta)}{\partial \beta} \\ \frac{1}{N} \sum_{i=1}^n \sum_{k=1}^{K_i} \sum_{s=1}^{S_{ik}} \frac{\partial \ell(\alpha; y_{iks}, \tilde{\mathbf{x}}(t_i, \theta), \mathbf{z}_{ik})}{\partial \phi} \end{pmatrix}, \\ G_n(\alpha) &= \begin{pmatrix} \frac{\partial M_n(\alpha)}{\partial \theta} \\ \frac{\partial M_n(\alpha)}{\partial \beta} \\ \frac{\partial M_n(\alpha)}{\partial \phi} \end{pmatrix} = \begin{pmatrix} \frac{1}{N} \sum_{i=1}^n \sum_{k=1}^{K_i} \sum_{s=1}^{S_{ik}} \frac{\partial \ell(\alpha; y_{iks}, \mathbf{x}(t_i, \theta), \mathbf{z}_{ik})}{\partial g^*} \frac{\partial g^*(\mathbf{z}_{ik}, \mathbf{x}(t_i, \theta), \beta)}{\partial \mathbf{x}} \Big|_{\mathbf{x}=\mathbf{x}(t_i, \theta)} \frac{\partial \mathbf{x}(t_i, \theta)}{\partial \theta} \\ \frac{1}{N} \sum_{i=1}^n \sum_{k=1}^{K_i} \sum_{s=1}^{S_{ik}} \frac{\partial \ell(\alpha; y_{iks}, \mathbf{x}(t_i, \theta), \mathbf{z}_{ik})}{\partial g^*} \frac{\partial g^*(\mathbf{z}_{ik}, \mathbf{x}(t_i, \theta), \beta)}{\partial \beta} \\ \frac{1}{N} \sum_{i=1}^n \sum_{k=1}^{K_i} \sum_{s=1}^{S_{ik}} \frac{\partial \ell(\alpha; y_{iks}, \mathbf{x}(t_i, \theta), \mathbf{z}_{ik})}{\partial \phi} \end{pmatrix}, \\ G(\alpha) &= \begin{pmatrix} \frac{\partial E_0[M(\alpha)]}{\partial \theta} \\ \frac{\partial E_0[M(\alpha)]}{\partial \beta} \\ \frac{\partial E_0[M(\alpha)]}{\partial \phi} \end{pmatrix} = \begin{pmatrix} E_0 \left[ \frac{\partial \ell(\alpha; y, \mathbf{x}(t, \theta), \mathbf{z})}{\partial g^*} \frac{\partial g^*(\mathbf{z}, \mathbf{x}, \beta)}{\partial \mathbf{x}} \Big|_{\mathbf{x}=\mathbf{x}(t, \theta)} \frac{\partial \mathbf{x}(t, \theta)}{\partial \theta} \right] \\ E_0 \left[ \frac{\partial \ell(\alpha; y, \mathbf{x}(t, \theta), \mathbf{z})}{\partial g^*} \frac{\partial g^*(\mathbf{z}, \mathbf{x}(t, \theta), \beta)}{\partial \beta} \right] \\ E_0 \left[ \frac{\partial \ell(\alpha; y, \mathbf{x}(t, \theta), \mathbf{z})}{\partial \phi} \right] \end{pmatrix}, \end{aligned}$$

where  $\frac{\partial \ell}{\partial g^*} = \frac{\partial}{\partial g^*} \ell(\cdot, g^*, \cdot) \Big|_{g^*=g^*(\mathbf{z}, \mathbf{x}, \beta)}$  with  $g^*(\mathbf{z}, \mathbf{x}, \beta)$  defined in (2.5). Since  $\hat{\alpha}$  and  $\alpha_0$  are maximum points of  $\tilde{M}_n(\alpha)$  and  $E_0[M(\alpha)]$ , respectively,  $\tilde{G}_n(\hat{\alpha}) = 0$  and  $G(\alpha_0) = 0$ .

First, we verify the result that  $\sqrt{N}[\tilde{G}_n(\alpha_0) - G(\alpha_0)] \xrightarrow{d} \mathcal{N}(0, \mathbf{H})$  with  $\mathbf{H}$  defined by (4.18). For fixed  $t$ , by the Landau-Kolmogorov inequality between different derivatives of a function, we have  $\left\| \frac{\partial \tilde{\mathbf{x}}(t, \theta)}{\partial \theta} - \frac{\partial \mathbf{x}(t, \theta)}{\partial \theta} \right\|_{\infty} \leq C \left\| \frac{\partial^2 \tilde{\mathbf{x}}(t, \theta)}{\partial \theta \partial \theta^T} - \frac{\partial^2 \mathbf{x}(t, \theta)}{\partial \theta \partial \theta^T} \right\|_{\infty}^{1/2} \left\| \tilde{\mathbf{x}}(t, \theta) - \mathbf{x}(t, \theta) \right\|_{\infty}^{1/2} \leq C' \left\| \tilde{\mathbf{x}}(t, \theta) - \mathbf{x}(t, \theta) \right\|_{\infty}^{1/2}$  for two constants  $C$  and  $C'$ , where the second inequality holds because of the uniform boundedness of both  $\frac{\partial^2 \mathbf{x}(t, \theta)}{\partial \theta \partial \theta^T}$  and  $\frac{\partial^2 \tilde{\mathbf{x}}(t, \theta)}{\partial \theta \partial \theta^T}$  under Assumptions A7-A8, and  $\|\Upsilon(\theta)\|_{\infty} = \sup_{\theta} |\Upsilon(\theta)|$  is the supremum norm of a function  $\Upsilon$ . Based on  $\sup_{t \in [t_0, T]} \left\| \tilde{\mathbf{x}}(t, \theta) - \mathbf{x}(t, \theta) \right\|_{\infty} = O(N^{-\lambda(p \wedge 4)})$  from Lemma 1 in [Xue et al. \(2010\)](#), it follows that  $\left\| \frac{\partial \tilde{\mathbf{x}}(t, \theta)}{\partial \theta} - \frac{\partial \mathbf{x}(t, \theta)}{\partial \theta} \right\| = O(N^{-\lambda(p \wedge 4)/2})$ .

Then we have

$$\begin{aligned}
& \sqrt{N}[\tilde{G}_n(\boldsymbol{\alpha}_0) - G(\boldsymbol{\alpha}_0)] \\
&= \left( \begin{aligned} & \frac{1}{\sqrt{N}} \sum_{i=1}^n \sum_{k=1}^{K_i} \sum_{s=1}^{S_{ik}} \frac{\partial \ell(\boldsymbol{\alpha}_0; y_{iks}, \tilde{\mathbf{x}}(t_i, \boldsymbol{\theta}_0), \mathbf{z}_{ik})}{\partial g^*} \frac{\partial g^*(\mathbf{z}_{ik}, \tilde{\mathbf{x}}, \boldsymbol{\beta}_0)}{\partial \tilde{\mathbf{x}}} \Big|_{\tilde{\mathbf{x}}=\tilde{\mathbf{x}}(t_i, \boldsymbol{\theta}_0)} \frac{\partial \tilde{\mathbf{x}}(t_i, \boldsymbol{\theta}_0)}{\partial \boldsymbol{\theta}_0} \\ & \frac{1}{\sqrt{N}} \sum_{i=1}^n \sum_{k=1}^{K_i} \sum_{s=1}^{S_{ik}} \frac{\partial \ell(\boldsymbol{\alpha}_0; y_{iks}, \tilde{\mathbf{x}}(t_i, \boldsymbol{\theta}_0), \mathbf{z}_{ik})}{\partial g^*} \frac{\partial g^*(\mathbf{z}_{ik}, \tilde{\mathbf{x}}(t_i, \boldsymbol{\theta}_0), \boldsymbol{\beta}_0)}{\partial \boldsymbol{\beta}_0} \\ & \frac{1}{\sqrt{N}} \sum_{i=1}^n \sum_{k=1}^{K_i} \sum_{s=1}^{S_{ik}} \frac{\partial \ell(\boldsymbol{\alpha}_0; y_{iks}, \tilde{\mathbf{x}}(t_i, \boldsymbol{\theta}_0), \mathbf{z}_{ik})}{\partial \phi_0} \end{aligned} \right) \\
&= \left( \begin{aligned} & \frac{1}{\sqrt{N}} \sum_{i=1}^n \sum_{k=1}^{K_i} \sum_{s=1}^{S_{ik}} \left[ \frac{\partial \ell(\boldsymbol{\alpha}_0; y_{iks}, \mathbf{x}(t_i, \boldsymbol{\theta}_0), \mathbf{z}_{ik})}{\partial g^*} + O_p(N^{-\lambda(p \wedge 4)}) \right] \left[ \frac{\partial g^*(\mathbf{z}_{ik}, \mathbf{x}, \boldsymbol{\beta}_0)}{\partial \mathbf{x}} \Big|_{\mathbf{x}=\mathbf{x}(t_i, \boldsymbol{\theta}_0)} + O_p(N^{-\lambda(p \wedge 4)}) \right] \\ & \quad \times \left[ \frac{\partial \mathbf{x}(t_i, \boldsymbol{\theta}_0)}{\partial \boldsymbol{\theta}_0} + O_p(N^{-\lambda(p \wedge 4)/2}) \right] \\ & \frac{1}{\sqrt{N}} \sum_{i=1}^n \sum_{k=1}^{K_i} \sum_{s=1}^{S_{ik}} \left[ \frac{\partial \ell(\boldsymbol{\alpha}_0; y_{iks}, \mathbf{x}(t_i, \boldsymbol{\theta}_0), \mathbf{z}_{ik})}{\partial g^*} + O_p(N^{-\lambda(p \wedge 4)}) \right] \left[ \frac{\partial g^*(\mathbf{z}_{ik}, \mathbf{x}(t_i, \boldsymbol{\theta}_0), \boldsymbol{\beta}_0)}{\partial \boldsymbol{\beta}_0} + O_p(N^{-\lambda(p \wedge 4)}) \right] \\ & \quad \frac{1}{\sqrt{N}} \sum_{i=1}^n \sum_{k=1}^{K_i} \sum_{s=1}^{S_{ik}} \left[ \frac{\partial \ell(\boldsymbol{\alpha}_0; y_{iks}, \mathbf{x}(t_i, \boldsymbol{\theta}_0), \mathbf{z}_{ik})}{\partial \phi_0} + O_p(N^{-\lambda(p \wedge 4)}) \right] \end{aligned} \right) \\
&= \left( \begin{aligned} & \frac{1}{\sqrt{N}} \sum_{i=1}^n \sum_{k=1}^{K_i} \sum_{s=1}^{S_{ik}} \frac{\partial \ell(\boldsymbol{\alpha}_0; y_{iks}, \mathbf{x}(t_i, \boldsymbol{\theta}_0), \mathbf{z}_{ik})}{\partial g^*} \frac{\partial g^*(\mathbf{z}_{ik}, \mathbf{x}, \boldsymbol{\beta}_0)}{\partial \mathbf{x}} \Big|_{\mathbf{x}=\mathbf{x}(t_i, \boldsymbol{\theta}_0)} \frac{\partial \mathbf{x}(t_i, \boldsymbol{\theta}_0)}{\partial \boldsymbol{\theta}_0} \\ & \frac{1}{\sqrt{N}} \sum_{i=1}^n \sum_{k=1}^{K_i} \sum_{s=1}^{S_{ik}} \frac{\partial \ell(\boldsymbol{\alpha}_0; y_{iks}, \mathbf{x}(t_i, \boldsymbol{\theta}_0), \mathbf{z}_{ik})}{\partial g^*} \frac{\partial g^*(\mathbf{z}_{ik}, \mathbf{x}(t_i, \boldsymbol{\theta}_0), \boldsymbol{\beta}_0)}{\partial \boldsymbol{\beta}_0} \\ & \frac{1}{\sqrt{N}} \sum_{i=1}^n \sum_{k=1}^{K_i} \sum_{s=1}^{S_{ik}} \frac{\partial \ell(\boldsymbol{\alpha}_0; y_{iks}, \mathbf{x}(t_i, \boldsymbol{\theta}_0), \mathbf{z}_{ik})}{\partial \phi_0} \end{aligned} \right) + O_p(N^{-\lambda(p \wedge 4)/2+1/2}) \\
&= \sqrt{N}[G_n(\boldsymbol{\alpha}_0) - G(\boldsymbol{\alpha}_0)] + O_p(N^{-\lambda(p \wedge 4)/2+1/2}).
\end{aligned}$$

When  $\lambda > 1/(p \wedge 4)$ ,  $O_p(N^{-\lambda(p \wedge 4)/2+1/2}) = o_p(1)$ . So for the above expression, we have  $\sqrt{N}[\tilde{G}_n(\boldsymbol{\alpha}_0) - G(\boldsymbol{\alpha}_0)] = \sqrt{N}[G_n(\boldsymbol{\alpha}_0) - G(\boldsymbol{\alpha}_0)] + o_p(1)$ . Based on the special structure of  $\xi_{ik}$  and  $\phi$  in (2.4), it is easy to follow that  $E_0 \left[ \frac{\partial \ell(\boldsymbol{\alpha}; y, \mathbf{x}, \mathbf{z})}{\partial(\boldsymbol{\theta}^T, \boldsymbol{\beta}^T)} \frac{\partial \ell(\boldsymbol{\alpha}; y, \mathbf{x}, \mathbf{z})}{\partial \phi} \right] \Big|_{\boldsymbol{\alpha}=\boldsymbol{\alpha}_0} = \mathbf{0}$ , that is, the dispersion parameter  $\phi$  is orthogonal to parameters  $\boldsymbol{\theta}$  and  $\boldsymbol{\beta}$  in the sense of [Cox and Reid \(1987\)](#). From the standard central limit theorem, we have  $\sqrt{N}[G_n(\boldsymbol{\alpha}_0) - G(\boldsymbol{\alpha}_0)] \xrightarrow{d} \mathcal{N}(0, \mathbf{J})$ , where

$$\mathbf{J} = \begin{pmatrix} E_0 \left[ \frac{\partial \ell(\boldsymbol{\alpha}; y, \mathbf{x}, \mathbf{z})}{\partial(\boldsymbol{\theta}^T, \boldsymbol{\beta}^T)^T} \frac{\partial \ell(\boldsymbol{\alpha}; y, \mathbf{x}, \mathbf{z})}{\partial(\boldsymbol{\theta}^T, \boldsymbol{\beta}^T)} \right] \Big|_{\boldsymbol{\alpha}=\boldsymbol{\alpha}_0} & \mathbf{0} \\ \mathbf{0}^T & E_0 \left[ \frac{\partial \ell(\boldsymbol{\alpha}; y, \mathbf{x}, \mathbf{z})}{\partial \phi} \right]^2 \Big|_{\boldsymbol{\alpha}=\boldsymbol{\alpha}_0} \end{pmatrix}$$

Thus it follows that  $\sqrt{N}[\tilde{G}_n(\boldsymbol{\alpha}_0) - G(\boldsymbol{\alpha}_0)] \xrightarrow{d} \mathcal{N}(0, \mathbf{J})$ .

Next, by similar arguments to those in the proof of Theorem 1, it follows that  $\sup_{\boldsymbol{\alpha} \in \Delta} \left\| \frac{\partial^2 M_n(\boldsymbol{\alpha})}{\partial \boldsymbol{\alpha} \partial \boldsymbol{\alpha}^T} + \mathbf{H}(\boldsymbol{\alpha}) \right\| \xrightarrow{P} 0$  with a neighborhood  $\Delta$  of  $\boldsymbol{\alpha}_0$ . By Lemma 1 in [Xue et al. \(2010\)](#), it follows that  $\sup_{\boldsymbol{\alpha} \in \Delta} \left\| \frac{\partial^2 M_n(\boldsymbol{\alpha})}{\partial \boldsymbol{\alpha} \partial \boldsymbol{\alpha}^T} - \frac{\partial^2 M_n(\boldsymbol{\alpha})}{\partial \boldsymbol{\alpha} \partial \boldsymbol{\alpha}^T} \right\| \xrightarrow{P} 0$ . Then we have  $\sup_{\boldsymbol{\alpha} \in \Delta} \left\| \frac{\partial^2 M_n(\boldsymbol{\alpha})}{\partial \boldsymbol{\alpha} \partial \boldsymbol{\alpha}^T} + \mathbf{H}(\boldsymbol{\alpha}) \right\| \xrightarrow{P} 0$ . By Theorem 1, Assumptions A9 and A10, and  $\mathbf{H} = \mathbf{J}$ , all conditions of Theorem 3.1 in [Newey and McFadden \(1994\)](#) are satisfied, thus Theorem 2(i) holds with a variance-covariance matrix  $(-\mathbf{H})^{-1} \mathbf{J} (-\mathbf{H})^{-1} = \mathbf{J}^{-1} = \mathbf{H}^{-1}$ .

Now, we consider the proof of Theorem 2(ii). Define

$$\begin{aligned}
\tilde{M}(\boldsymbol{\alpha}) &= \ell(\boldsymbol{\alpha}; y, \tilde{\mathbf{x}}, \mathbf{z}) \\
&= \frac{y \cdot b^{-1} \circ g^{-1} \circ g^*(\mathbf{z}, \tilde{\mathbf{x}}(t, \boldsymbol{\theta}), \boldsymbol{\beta}) - b\{b^{-1} \circ g^{-1} \circ g^*(\mathbf{z}, \tilde{\mathbf{x}}(t, \boldsymbol{\theta}), \boldsymbol{\beta})\}}{a(\phi)} + c(y, \phi),
\end{aligned}$$

and

$$\tilde{G}(\boldsymbol{\alpha}) = \begin{pmatrix} \frac{\partial \tilde{M}(\boldsymbol{\alpha})}{\partial \boldsymbol{\theta}} \\ \frac{\partial \tilde{M}(\boldsymbol{\alpha})}{\partial \boldsymbol{\beta}} \\ \frac{\partial \tilde{M}(\boldsymbol{\alpha})}{\partial \phi} \end{pmatrix} = \begin{pmatrix} E_0 \left[ \frac{\partial \ell(\boldsymbol{\alpha}; y, \tilde{\mathbf{x}}(t, \boldsymbol{\theta}), \mathbf{z})}{\partial g^*} \frac{\partial g^*(z, \tilde{\mathbf{x}}, \boldsymbol{\beta})}{\partial \tilde{\mathbf{x}}} \Big|_{\tilde{\mathbf{x}} = \tilde{\mathbf{x}}(t, \boldsymbol{\theta})} \frac{\partial \tilde{\mathbf{x}}(t, \boldsymbol{\theta})}{\partial \boldsymbol{\theta}} \right] \\ E_0 \left[ \frac{\partial \ell(\boldsymbol{\alpha}; y, \tilde{\mathbf{x}}(t, \boldsymbol{\theta}), \mathbf{z})}{\partial g^*} \frac{\partial g^*(z, \tilde{\mathbf{x}}(t, \boldsymbol{\theta}), \boldsymbol{\beta})}{\partial \boldsymbol{\beta}} \right] \\ E_0 \left[ \frac{\partial \ell(\boldsymbol{\alpha}; y, \tilde{\mathbf{x}}(t, \boldsymbol{\theta}), \mathbf{z})}{\partial \phi} \right] \end{pmatrix}.$$

Since  $E_0[\tilde{M}(\boldsymbol{\alpha})]$  reaches its maximum at  $\boldsymbol{\alpha} = \tilde{\boldsymbol{\alpha}}$ , then the first-order derivative of  $E_0[\tilde{M}(\boldsymbol{\alpha})]$  at  $\tilde{\boldsymbol{\alpha}}$  equals to 0, i.e.,  $\tilde{G}(\tilde{\boldsymbol{\alpha}}) = 0$ . Then similar to the proof of Case (i) above, we have

$$\begin{aligned} \tilde{G}(\boldsymbol{\alpha}) &= \begin{pmatrix} E_0 \left[ \frac{\partial \ell(\boldsymbol{\alpha}; y, \mathbf{x}(t, \boldsymbol{\theta}), \mathbf{z})}{\partial g^*} + O_p(N^{-\lambda(p \wedge 4)}) \right] \left[ \frac{\partial g^*(z, \mathbf{x}, \boldsymbol{\beta})}{\partial \mathbf{x}} \Big|_{\mathbf{x} = \mathbf{x}(t, \boldsymbol{\theta})} + O_p(N^{-\lambda(p \wedge 4)}) \right] \\ \quad \times \left[ \frac{\partial \mathbf{x}(t, \boldsymbol{\theta})}{\partial \boldsymbol{\theta}} + O_p(N^{-\lambda(p \wedge 4)/2}) \right] \\ E_0 \left[ \frac{\partial \ell(\boldsymbol{\alpha}; y, \mathbf{x}(t, \boldsymbol{\theta}), \mathbf{z})}{\partial g^*} + O_p(N^{-\lambda(p \wedge 4)}) \right] \left[ \frac{\partial g^*(z, \mathbf{x}(t, \boldsymbol{\theta}), \boldsymbol{\beta})}{\partial \boldsymbol{\beta}} + O_p(N^{-\lambda(p \wedge 4)}) \right] \\ E_0 \left[ \frac{\partial \ell(\boldsymbol{\alpha}; y, \mathbf{x}(t, \boldsymbol{\theta}), \mathbf{z})}{\partial \phi} + O_p(N^{-\lambda(p \wedge 4)}) \right] \end{pmatrix} \\ &= \begin{pmatrix} E_0 \left[ \frac{\partial \ell(\boldsymbol{\alpha}; y, \mathbf{x}(t, \boldsymbol{\theta}), \mathbf{z})}{\partial g^*} \frac{\partial g^*(z, \mathbf{x}(t, \boldsymbol{\theta}), \boldsymbol{\beta})}{\partial \mathbf{x}} \Big|_{\mathbf{x} = \mathbf{x}(t, \boldsymbol{\theta})} \frac{\partial \mathbf{x}(t, \boldsymbol{\theta})}{\partial \boldsymbol{\theta}} \right] \\ E_0 \left[ \frac{\partial \ell(\boldsymbol{\alpha}; y, \mathbf{x}(t, \boldsymbol{\theta}), \mathbf{z})}{\partial g^*} \frac{\partial g^*(z, \mathbf{x}(t, \boldsymbol{\theta}), \boldsymbol{\beta})}{\partial \boldsymbol{\beta}} \right] \\ E_0 \left[ \frac{\partial \ell(\boldsymbol{\alpha}; y, \mathbf{x}(t, \boldsymbol{\theta}), \mathbf{z})}{\partial \phi} \right] \end{pmatrix} + O_p(N^{-\lambda(p \wedge 4)/2}) \\ &= G(\boldsymbol{\alpha}) + O_p(N^{-\lambda(p \wedge 4)/2}). \end{aligned}$$

It follows that  $\tilde{G}(\tilde{\boldsymbol{\alpha}}) = G(\tilde{\boldsymbol{\alpha}}) + O_p(N^{-\lambda(p \wedge 4)/2})$ , then  $G(\tilde{\boldsymbol{\alpha}}) = O_p(N^{-\lambda(p \wedge 4)/2})$  from  $\tilde{G}(\tilde{\boldsymbol{\alpha}}) = 0$ . The Taylor series expansion yields that there exist constants  $0 < c_1, c_2 < \infty$  such that

$$c_1 \|\tilde{\boldsymbol{\alpha}} - \boldsymbol{\alpha}_0\| \leq |G(\tilde{\boldsymbol{\alpha}}) - G(\boldsymbol{\alpha}_0)| \leq c_2 \|\tilde{\boldsymbol{\alpha}} - \boldsymbol{\alpha}_0\|.$$

Thus  $\|\tilde{\boldsymbol{\alpha}} - \boldsymbol{\alpha}_0\| = O_p(N^{-\lambda(p \wedge 4)/2})$  from  $G(\boldsymbol{\alpha}_0) = 0$ . It follows that  $\tilde{\boldsymbol{\alpha}} \xrightarrow{p} \boldsymbol{\alpha}_0$ . By Assumption A9, we have that  $\tilde{\boldsymbol{\alpha}}$  is also an interior point of  $\Theta \times \mathcal{B} \times \Phi$  for sufficiently large  $N$ . Similarly we can show that  $\|\tilde{\mathbf{H}} - \mathbf{H}\| = O_p(N^{-\lambda(p \wedge 4)/2})$ . By Assumption A10, we have that  $\tilde{\mathbf{H}}$  is also nonsingular for sufficiently large  $N$ . Then it is straightforward to derive the asymptotic normality of Theorem 2(ii) by verifying the conditions of Theorem 3.3 in [Newey and McFadden \(1994\)](#) on asymptotic normality for MLE.  $\square$

**Theorem 3.** For the weighted MLE  $\hat{\alpha}^*$  in (3.14), under the same assumptions as those in Theorem 2 as well as Assumption A11, we have that,

(i) for  $\lambda > 1/(p \wedge 4)$ ,  $\sqrt{N/v_0}(\hat{\alpha}^* - \hat{\alpha})$  has the same conditional limiting distribution as  $\sqrt{N}(\hat{\alpha} - \alpha_0)$  has unconditionally, i.e.,  $\left(\sqrt{N/v_0}(\hat{\alpha}^* - \hat{\alpha}) \mid \{t_i, z_{ik}, y_{iks}\}\right) \xrightarrow{d} \sqrt{N}(\hat{\alpha} - \alpha_0)$ . Thus  $\sqrt{N}(\hat{\alpha}^* - \alpha_0) \xrightarrow{d} N(0, (1 + v_0)\mathbf{H}^{-1})$ .

(ii) for  $0 < \lambda \leq 1/(p \wedge 4)$ ,  $\left(\sqrt{N/v_0}(\hat{\alpha}^* - \hat{\alpha}) \mid \{t_i, z_{ik}, y_{iks}\}\right) \xrightarrow{d} \sqrt{N}(\hat{\alpha} - \tilde{\alpha})$ . Thus  $\sqrt{N}(\hat{\alpha}^* - \tilde{\alpha}) \xrightarrow{d} N(0, (1 + v_0)\tilde{\mathbf{H}}^{-1})$ .

**Proof:** Replace all likelihood functions  $\ell(\cdot)$  in the proofs of Theorems 1-2 with the weight likelihood functions  $w\ell(\cdot)$  and denote

$$\begin{aligned}\tilde{M}_n^*(\alpha) &= \frac{1}{N} \sum_{i=1}^n \sum_{k=1}^{K_i} \sum_{s=1}^{S_{ik}} w_{iks} \ell(\alpha; y_{iks}, \tilde{\mathbf{x}}_i, \mathbf{z}_{ik}), \\ M_n^*(\alpha) &= \frac{1}{N} \sum_{i=1}^n \sum_{k=1}^{K_i} \sum_{s=1}^{S_{ik}} w_{iks} \ell(\alpha; y_{iks}, \mathbf{x}_i, \mathbf{z}_{ik}), \\ M^*(\alpha) &= w\ell(\alpha; y, \mathbf{x}, \mathbf{z}),\end{aligned}$$

$$\text{and } \tilde{G}_n^*(\alpha) = \frac{\partial \tilde{M}_n^*(\alpha)}{\partial \alpha}, G_n^*(\alpha) = \frac{\partial M_n^*(\alpha)}{\partial \alpha}, G^*(\alpha) = \frac{\partial E_0[M^*(\alpha)]}{\partial \alpha}.$$

First, we claim that under Assumptions A1-A9 and A11, we have  $\hat{\alpha}^* - \alpha_0 \rightarrow 0$ , almost surely under  $P_{\alpha_0}$ , i.e., Theorem 1 still holds for the weighted MLE  $\hat{\alpha}^*$ . In fact, by the Jensen's inequality, the convexity of function  $-\log x$ ,  $E(w) = 1$  and the independence between  $w$  and  $(t, y, z)$ , we have

$$\begin{aligned}& E_0[M^*(\alpha)] - E_0[M^*(\alpha_0)] \\ &= E_0[w\ell(\alpha; y, \mathbf{x}, \mathbf{z}) - w\ell(\alpha_0; y, \mathbf{x}, \mathbf{z})] \\ &= E(w)E_0[\ell(\alpha; y, \mathbf{x}, \mathbf{z}) - \ell(\alpha_0; y, \mathbf{x}, \mathbf{z})] \\ &\leq 0,\end{aligned}$$

i.e.,  $\alpha = \alpha_0$  is still the maximum point of function  $E_0[M^*(\alpha)]$ . In addition, from Assumption A6, it follows that it is the unique maximum point. Under Assumption A11, similar to (A.1), for any  $\alpha_1, \alpha_2 \in \Theta \times \mathcal{B} \times \Phi$ , we have

$$|M_n^*(\alpha_1) - M_n^*(\alpha_2)| \leq Q|M_n(\alpha_1) - M_n(\alpha_2)| \leq C(\mathbf{y}, \mathbf{x}, \mathbf{z})Q\|\alpha_1 - \alpha_2\|.$$

The remaining steps to prove this claim are similar to those in the proof of Theorem 1.

Next, we claim that  $\sqrt{N}(\hat{\alpha}^* - \alpha_0) \xrightarrow{d} \mathcal{N}(0, (1 + v_0)\mathbf{H}^{-1})$  or  $\sqrt{N}(\tilde{\alpha}^* - \tilde{\alpha}) \xrightarrow{d} \mathcal{N}(0, (1 + v_0)\tilde{\mathbf{H}}^{-1})$  for  $\lambda > 1/(p \wedge 4)$  and  $0 < \lambda \leq 1/(p \wedge 4)$ , respectively. We verify it as follows.

Since  $\hat{\alpha}^*$  and  $\alpha_0$  are the maximum points of  $\tilde{M}_n^*(\alpha)$  and  $E_0[M^*(\alpha)]$ , respectively,  $\tilde{G}_n^*(\hat{\alpha}^*) = 0$  and  $G^*(\alpha_0) = 0$ . By similar arguments to those in the proof of Theorem 2, we have  $\sqrt{N}[\tilde{G}_n^*(\alpha_0) - G^*(\alpha_0)] = \sqrt{N}[G_n^*(\alpha_0) - G^*(\alpha_0)] + o_p(1)$ . From the standard central limit theorem and  $E(w^2) = 1 + v_0$ , we have  $\sqrt{N}[G_n^*(\alpha_0) - G^*(\alpha_0)] \xrightarrow{d} \mathcal{N}(0, (1 + v_0)\mathbf{J})$ . Thus it follows that  $\sqrt{N}[\tilde{G}_n^*(\alpha_0) - G^*(\alpha_0)] \xrightarrow{d} \mathcal{N}(0, (1 + v_0)\mathbf{J})$ . In addition, by the weak law of large number and  $E(w) = 1$ , it follows that

$$\frac{\partial^2 M_n^*(\alpha)}{\partial \alpha \partial \alpha^T} \xrightarrow{p} E_0 \left[ \frac{\partial^2 M^*(\alpha)}{\partial \alpha \partial \alpha^T} \right] = E(w)E_0 \left[ \frac{\partial^2 M(\alpha)}{\partial \alpha \partial \alpha^T} \right] = -\mathbf{H}.$$

The remaining steps to prove this claim are similar to those in the proof of Theorem 2. Combining the second claim and Theorem 2, we have that

$$\left(\sqrt{N/v_0}(\hat{\alpha}^* - \hat{\alpha}) \mid \{t_i, z_{ik}, y_{iks}\}\right) \xrightarrow{d} \sqrt{N}(\hat{\alpha} - \alpha_0)$$

for  $\lambda > 1/(p \wedge 4)$  and

$$\left(\sqrt{N/v_0}(\hat{\alpha}^* - \hat{\alpha}) \mid \{t_i, z_{ik}, y_{iks}\}\right) \xrightarrow{d} \sqrt{N}(\hat{\alpha} - \tilde{\alpha})$$

for  $0 < \lambda \leq 1/(p \wedge 4)$ , respectively. □

## References

- Andrews, D. W. K. (1987), “Consistency in nonlinear econometric models: a general uniform law of large numbers,” *Econometrica*, 55, 1465–1471.
- Cox, D. R., and Reid, N. (1987), “Parameter orthogonality and approximate conditional inference,” *Journal of Royal Statistical Society, Series B*, 49(1), 1–39.
- Newey, W., and McFadden, D. (1994), “Large sample estimation and hypothesis testing,” in *Handbook of Econometrics, Vol. 4*, eds. R. Engle, and D. McFadden, Amsterdam, The Netherlands: Elsevier, chapter 36, pp. 2111–2245.
- Xue, H., Miao, H., and Wu, H. (2010), “Sieve estimation of constant and time-varying coefficients in nonlinear ordinary differential equation models by considering both numerical error and measurement error,” *The Annals of Statistics*, 38(4), 2351–2387.

## B Additional Simulation Result

Table B.1: Evaluation of the GODE method by calculating average relative errors (ARE) in parameter estimates based on 500 simulation runs with  $\rho_E$  fixed at zero.

| distribution | # of obs.<br>per dilu. factor | variance | ARE(%) of GODE |           |                |       | ARE(%) of ESB |          |           |                |       |       |
|--------------|-------------------------------|----------|----------------|-----------|----------------|-------|---------------|----------|-----------|----------------|-------|-------|
|              |                               |          | $\rho_E$       | $\beta_E$ | $\delta_{E^*}$ | $c_V$ | $\beta$       | $\rho_E$ | $\beta_E$ | $\delta_{E^*}$ | $c_V$ |       |
| binomial     | 5                             | -        | fixed          | 8.53%     | 32.5%          | 27.7% | 3.97%         | fixed    | 91.9%     | 72.8%          | 36.5% | 3.85% |
|              | 10                            | -        | fixed          | 6.49%     | 18.9%          | 18.9% | 2.85%         | fixed    | 96.3%     | 72.1%          | 30.1% | 2.83% |
|              | 20                            | -        | fixed          | 4.27%     | 12.4%          | 12.5% | 2.02%         | fixed    | 87.5%     | 38.6%          | 19.2% | 2.33% |
| Poisson      | 5                             | -        | fixed          | 13.0%     | 45.6%          | 42.1% | 7.05%         | fixed    | 68.1%     | 85.3%          | 38.1% | 6.95% |
|              | 10                            | -        | fixed          | 8.67%     | 31.5%          | 28.8% | 4.91%         | fixed    | 72.8%     | 66.7%          | 29.4% | 4.94% |
|              | 20                            | -        | fixed          | 6.38%     | 21.2%          | 19.8% | 3.45%         | fixed    | 69.2%     | 51.2%          | 19.5% | 3.49% |
| Gamma        | 5                             | 3.0      | fixed          | 10.3%     | 48.3%          | 58.1% | 84.3%         | fixed    | 86.0%     | 86.5%          | 58.6% | 84.6% |
|              | 10                            | 1.5      | fixed          | 6.46%     | 48.8%          | 44.3% | 76.9%         | fixed    | 107%      | 83.8%          | 29.8% | 77.1% |
|              | 20                            | 0.75     | fixed          | 11.8%     | 35.9%          | 25.0% | 69.5%         | fixed    | 113%      | 89.4%          | 21.2% | 69.7% |
| normal       | 5                             | 3.0      | fixed          | 47.7%     | 72.4%          | 116%  | 54.8%         | fixed    | 66.3%     | 74.2%          | 46.1% | 71.8% |
|              | 10                            | 1.5      | fixed          | 20.1%     | 53.9%          | 60.2% | 13.9%         | fixed    | 66.7%     | 61.8%          | 31.8% | 15.4% |
|              | 20                            | 0.75     | fixed          | 9.11%     | 30.5%          | 27.8% | 6.41%         | fixed    | 62.5%     | 52.0%          | 22.2% | 6.33% |
